# Supplementary material for: Structure, adsorption and magnetic properties of chiral metal–organic frameworks bearing linear trinuclear secondary building blocks
Source: Royal Society of Chemistry journal article supplement (doi:10.1039/c0dt01278e), 2011-01-01
Supplement: c0dt01278e.pdf [file c0dt01278e.pdf]

**Structure, adsorption and magnetic properties of chiral  
Metal-Organic Frameworks bearing linear trinuclear secondary  
building blocks**

Zilu Chen, Xianlin Liu, Chuanbing Zhang, Zhong Zhang, Fupei Liang

Key Laboratory for the Chemistry and Molecular Engineering of Medicinal Resources  
(Ministry of Education of China), School of Chemistry & Chemical Engineering of Guangxi  
Normal University, Guilin 541004, P. R. China. Fax: +82(0)773/5832294; E-mail:  
chenziluczl@yahoo.co.uk

**Electronic Supplementary Information**

**Fig. S1** TG curves of **1** and **2**.

**Fig. S2** TG curves of **3** and **4**.

**Fig. S3** PXRD patterns of **1-4**.

**Fig. S4** PXRD patterns of **1** upon desolvation and resolution.

**Fig. S5** Plot of  $\chi_m^{-1}$  vs.  $T$  for **1**. The solid line denotes the theoretical fit of the experimental data using the Curie-Weiss law.

**Fig. S6** Plot of  $\chi_m^{-1}$  vs.  $T$  for **3**. The solid line denotes the theoretical fit of the experimental data using the Curie-Weiss law.

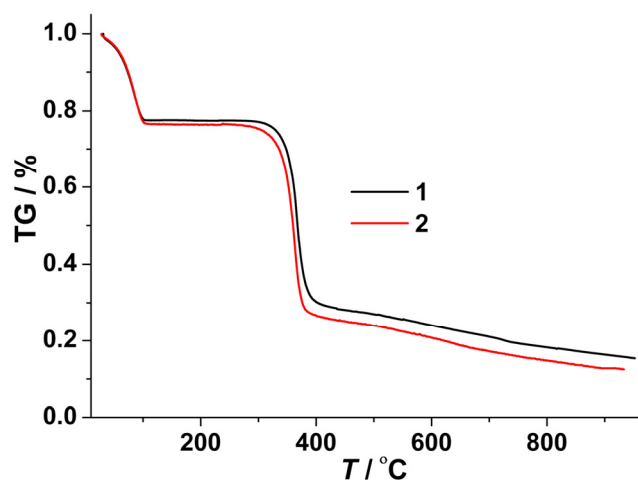

Fig. S1 TG curves of 1 and 2.

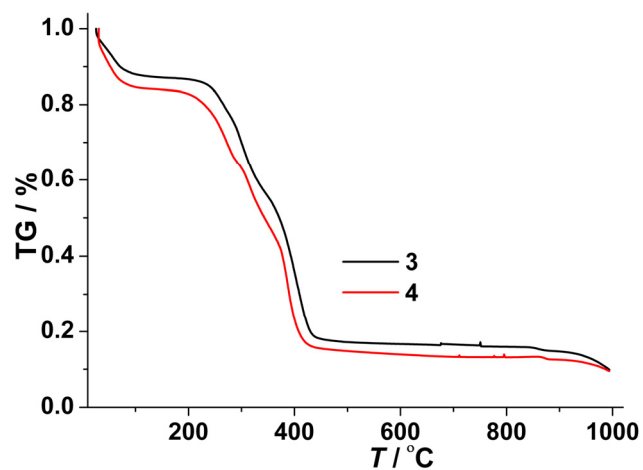

Fig. S2 TG curves of 3 and 4.

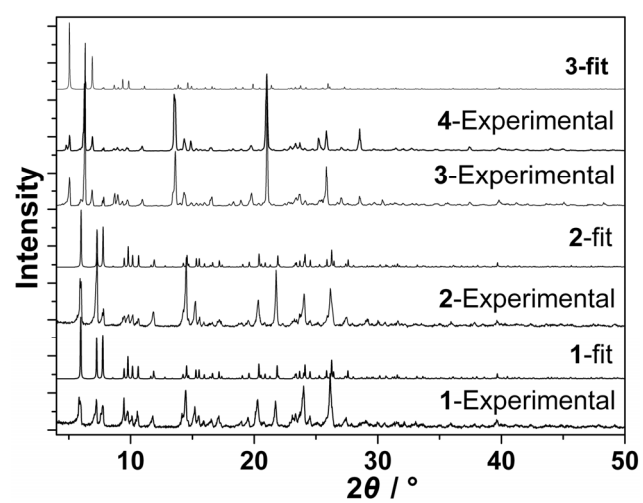

Fig. S3 PXRD patterns of 1-4.

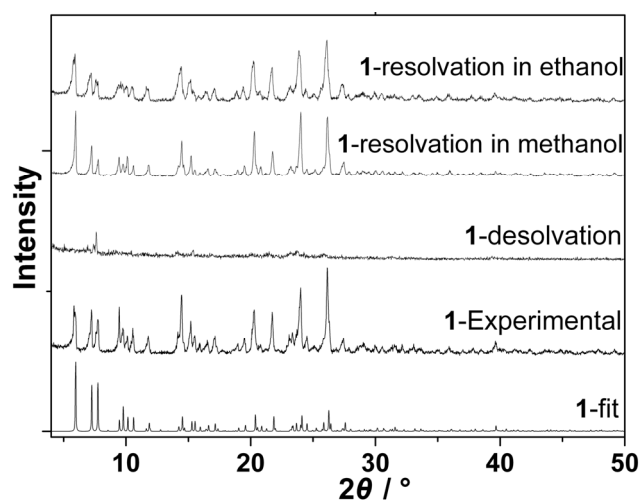

**Fig. S4** PXRD patterns of **1** upon desolvation and resolution.

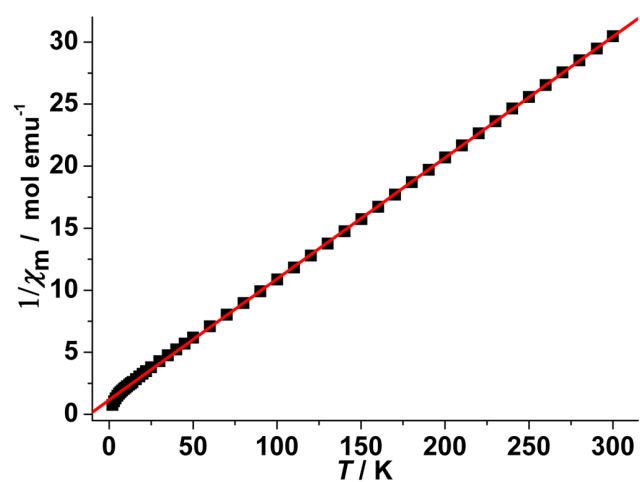

**Fig. S5** Plot of  $\chi_m^{-1}$  vs.  $T$  for **1**. The solid line denotes the theoretical fit of the experimental data using the Curie-Weiss law.

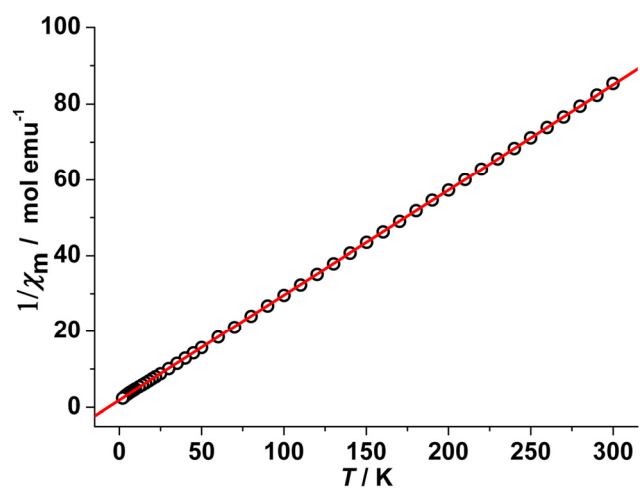

**Fig. S6** Plot of  $\chi_m^{-1}$  vs.  $T$  for **3**. The solid line denotes the theoretical fit of the experimental data using the Curie-Weiss law.
